# Supplementary material for: Thermal nanoimprint lithography of polymer films on non-adhesive substrates by using mussel-inspired adhesive polymer layers
Source: Royal Society of Chemistry journal article supplement (doi:10.1039/c3tc00882g), 2013-01-01
Supplement: c3tc00882g.pdf [file c3tc00882g.pdf]

## Electric Supplementary Information

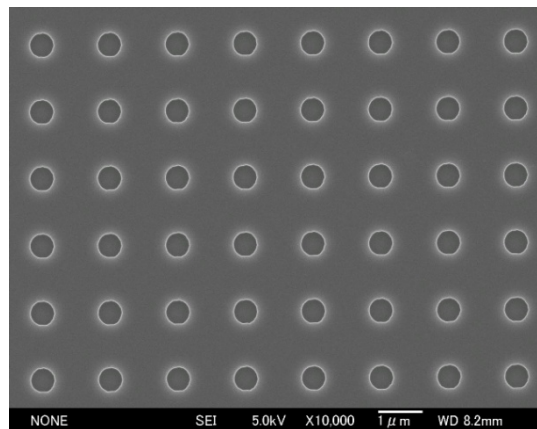

Figure S1. SEM image of micropit arrays prepared on Si substrate.

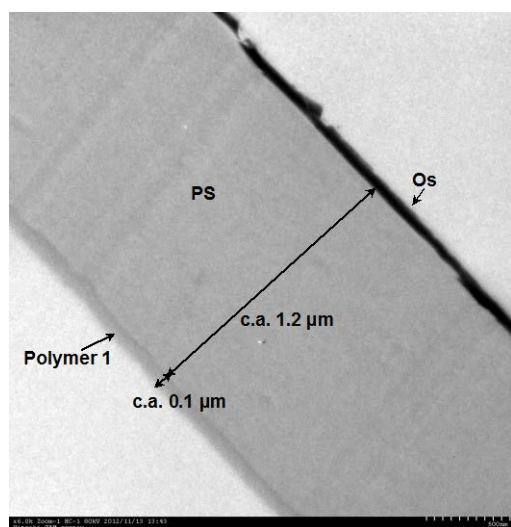

Figure S2. Cross-sectional TEM image of polymer 1 and PS film. The polymer 1 and PS film was prepared onto PVA-coated glass substrate by spin coating at same condition as shown in the experimental section, and then, the Os was sputtered onto the surface of the film by discharge ion sputtering. After dissolving PVA layer in water, the film was scooped up onto a epoxy resin and prepolymer of epoxy resin was overcoated and cured. Thin slice spacemen was prepared by ultramicrotome and the spacemen was placed on a Cu grid covered with a collodion membrane. Cross-sectional TEM image was observed by using H-7650, Hitachi, Japan.

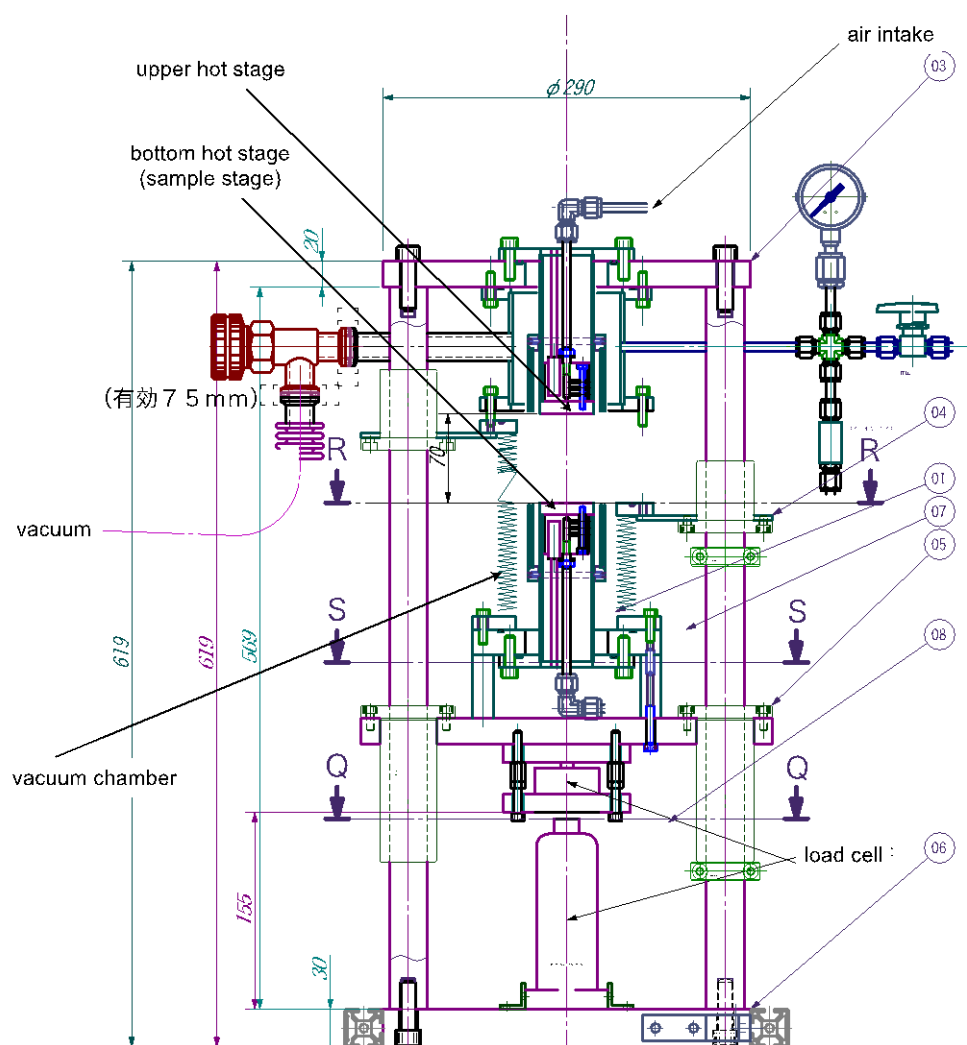

Figure S3. Schematic illustration of hand-made NIL system.
